# Supplementary material for: Prevalence of Integrons and Insertion Sequences in ESBL-Producing E. coli Isolated from Different Sources in Navarra, Spain
Source: PubMed Central journal article supplement (PMC6209886; doi:10.3390/ijerph15102308), 2018-10-20
Supplement: ijerph-15-02308-s001.pdf [file ijerph-15-02308-s001.pdf]

# Supplementary Materials: Prevalence of Integrons and Insertion Sequences in ESBL-Producing *E. coli* Isolated from Different Sources in Navarra, Spain

Lara Pérez-Etayo <sup>1,\*</sup>, Melibea Berzosa <sup>1</sup>, David González <sup>1,2</sup> and Ana Isabel Vitas <sup>1,2</sup>

<sup>1</sup> Department of Microbiology and Parasitology, University of Navarra, 31008 Pamplona, Spain; mberzosa.1@alumni.unav.es (M.B.); dgonzalez@unav.es (D.G.); avitas@unav.es (A.I.V.)

<sup>2</sup> IDISNA, Navarra Health Research Institute, 31008 Pamplona, Spain

\* Correspondence: lperez.13@alumni.unav.es; Tel.: +34-948-425-600

Received: 14 September 2018; Accepted: date; Published: date

**Table S1.** Antimicrobial profiles of ESBL-producing *E. coli* according to their origin.

| Family                       | Antibiotic <sup>1</sup> | Origin of Strains   |                |                  |      |                 |
|------------------------------|-------------------------|---------------------|----------------|------------------|------|-----------------|
|                              |                         | Hospital inpatients | Healthy people | WWTPs and rivers | Food | Farms and Feeds |
| Penicillin                   | AMP                     | 100                 | 92.3           | 100              | 100  | 100             |
|                              | PIP                     | 100                 | 76.9           | 100              | 100  | 100             |
|                              | MZ                      | 100                 | 84.6           | 100              | 100  | 100             |
|                              | CZ                      | 100                 | 92.3           | 100              | 100  | 100             |
|                              | CXM                     | 100                 | 92.3           | 100              | 100  | 100             |
| Cephalosporin                | CPD                     | 100                 | 92.3           | 100              | 100  | 100             |
|                              | CTX                     | 100                 | 84.6           | 100              | 100  | 100             |
|                              | CAZ                     | 100                 | 92.3           | 97               | 100  | 95              |
|                              | FOX                     | 8.3                 | 7.6            | 3                | 4.2  | 20              |
|                              | FEP                     | 97.2                | 84.6           | 97               | 100  | 100             |
| Monobactams                  | AZT                     | 100                 | 84.6           | 97               | 100  | 100             |
|                              | AMC                     | 47.2                | 23             | 6                | 4.2  | 10              |
| $\beta$ -lactamase inhibitor | AMS                     | 100                 | 46.1           | 69               | 41.6 | 65              |
|                              | TZP                     | 25                  | 0              | 0                | 2.1  | 0               |
|                              | ETP                     | 0                   | 0              | 0                | 2.1  | 0               |
| Carbapenem                   | MER                     | 0                   | 0              | 0                | 2.1  | 0               |
|                              | IMP                     | 0                   | 0              | 0                | 2.1  | 0               |
| Aminoglycosides              | AK                      | 2.7                 | 0              | 0                | 0    | 0               |
|                              | GM                      | 44.5                | 7.6            | 24.2             | 8.3  | 10              |
|                              | TO                      | 61                  | 7.6            | 18.2             | 4.1  | 10              |
| Quinolones                   | LV                      | 69.5                | 53.8           | 27.3             | 39.5 | 65              |
|                              | CIP                     | 69.5                | 7.6            | 33.3             | 60.4 | 70              |
|                              | MXF                     | 69.5                | 53.8           | 30.3             | 64.5 | 90              |
| Tetracycline                 | TET                     | 80.5                | 30.7           | 75.7             | 91.6 | 90              |

|        |     |      |      |      |      |    |
|--------|-----|------|------|------|------|----|
|        | TIG | 0    | 0    | 0    | 2    | 0  |
|        | COL | 22.2 | 15.4 | 30.3 | 6.2  | 15 |
|        | SXT | 80.5 | 46.1 | 39.3 | 41.6 | 35 |
| Others | FOT | 8.3  | 7.6  | 0    | 2    | 25 |
|        | FM  | 0    | 0    | 0    | 8.3  | 0  |
|        | CHL | 16.6 | 0    | 12.1 | 31.2 | 10 |

---

<sup>1</sup> Ampicillin, AMP; piperacillin, PIP; mezlocillin, MZ; cefazolin, CZ; cefuroxime, CXM; cefpodoxime, CPD; cefotaxime, CTX; ceftazidime, CAZ, cefoxitin, FOX; cefepime, FEP; aztreonam, AZT; amoxicillin clavulanic acid, AMC; amoxicillin sulbactam, AMS; piperacillin tazobactam, TZP; ertapenem, ETP; meropenem, MER; imipenem, IMP; Amikacin, AK; gentamicin, GM; tobramycin, TO; levofloxacin, LV; ciprofloxacin, CIP; moxifloxacin, MXF; tetracycline, TET; tigecycline, TIG; colistin, COL; trimethoprim sulfamethoxazole, SXT; fosfomycin, FOT; nitrofurantoin, FM; chloramphenicol, CHL.

**Table S2.** Phenotypic and genotypic characteristics of isolates from hospital inpatients (*n*=36)

| N <sup>o</sup> | β-lactamase genes                                                                                                            | Phylogroup | MLST               |                     | Integrans |       | Insertion Sequence |      |       |       |
|----------------|------------------------------------------------------------------------------------------------------------------------------|------------|--------------------|---------------------|-----------|-------|--------------------|------|-------|-------|
|                |                                                                                                                              |            | Sequence type (ST) | Clonal complex (CC) | intI1     | intI2 | ISEcp1             | IS26 | IS903 | ISCR1 |
| 1              | <i>bla</i> <sub>CTX-M-3</sub> , <i>bla</i> <sub>OXA-1</sub>                                                                  | B2         | ST838              | ST131               | +         | -     | -                  | +    | +     | -     |
| 2              | <i>bla</i> <sub>CTX-M-14</sub> , <i>bla</i> <sub>TEM-42</sub>                                                                | A          | ST453              | ST86                | +         | +     | +                  | +    | +     | -     |
| 3              | <i>bla</i> <sub>CTX-M-1</sub> , <i>bla</i> <sub>TEM-1</sub>                                                                  | D          | ST563              | ST398               | +         | -     | +                  | +    | +     | -     |
| 4              | <i>bla</i> <sub>CTX-M-15</sub> , <i>bla</i> <sub>TEM-42</sub>                                                                | B2         | ST3329             | ST131               | +         | -     | +                  | +    | +     | -     |
| 5              | <i>bla</i> <sub>CTX-M-14</sub> , <i>bla</i> <sub>TEM-1</sub>                                                                 | A          | ST98               | ST10                | +         | +     | +                  | +    | +     | -     |
| 6              | <i>bla</i> <sub>CTX-M-15</sub> , <i>bla</i> <sub>TEM-1</sub>                                                                 | B2         | ST3329             | ST131               | +         | -     | +                  | +    | +     | -     |
| 7              | <i>bla</i> <sub>CTX-M-15</sub> , <i>bla</i> <sub>OXA-1</sub>                                                                 | D          | ST648              | ST648               | +         | -     | +                  | +    | +     | +     |
| 8              | <i>bla</i> <sub>CTX-M-15</sub> , <i>bla</i> <sub>OXA-1</sub>                                                                 | B2         | ST3213             | ST131               | +         | -     | -                  | +    | +     | -     |
| 9              | <i>bla</i> <sub>CTX-M-1</sub> , <i>bla</i> <sub>CTX-M-14</sub> , <i>bla</i> <sub>TEM-42</sub>                                | D          | ST867              | ND                  | +         | -     | +                  | +    | +     | +     |
| 10             | <i>bla</i> <sub>CTX-M-14</sub> , <i>bla</i> <sub>CTX-M-15</sub> , <i>bla</i> <sub>TEM-1</sub>                                | B1         | ST448              | ST448               | +         | -     | +                  | +    | +     | -     |
| 11             | <i>bla</i> <sub>CTX-M-15</sub> , <i>bla</i> <sub>OXA-1</sub>                                                                 | B2         | ST3213             | ST131               | +         | -     | -                  | +    | +     | -     |
| 12             | <i>bla</i> <sub>CTX-M-15</sub> , <i>bla</i> <sub>OXA-1</sub>                                                                 | B2         | ST2704             | ST131               | +         | -     | -                  | +    | +     | -     |
| 13             | <i>bla</i> <sub>CTX-M-15</sub> , <i>bla</i> <sub>TEM-1</sub> , <i>bla</i> <sub>OXA-1</sub>                                   | D          | ST405              | ST405               | +         | -     | -                  | +    | +     | -     |
| 14             | <i>bla</i> <sub>CTX-M-15</sub> , <i>bla</i> <sub>OXA-1</sub>                                                                 | B2         | ST3878             | ST131               | +         | -     | -                  | +    | +     | -     |
| 15             | <i>bla</i> <sub>CTX-M-15</sub> , <i>bla</i> <sub>TEM-1</sub> , <i>bla</i> <sub>OXA-1</sub>                                   | D          | ST405              | ST405               | +         | -     | -                  | +    | +     | -     |
| 16             | ND <sup>1</sup>                                                                                                              | A          | ST617              | ST10                | +         | -     | +                  | +    | +     | +     |
| 17             | ND                                                                                                                           | D          | ST648              | ST648               | +         | -     | -                  | +    | -     | -     |
| 18             | <i>bla</i> <sub>CTX-M-15</sub> , <i>bla</i> <sub>OXA-1</sub>                                                                 | D          | ST72               | ST405               | +         | -     | -                  | +    | +     | -     |
| 19             | <i>bla</i> <sub>CTX-M-14</sub> , <i>bla</i> <sub>OXA-1</sub>                                                                 | B2         | ST73               | ST73                | +         | -     | +                  | +    | +     | -     |
| 20             | <i>bla</i> <sub>CTX-M-15</sub> , <i>bla</i> <sub>OXA-1</sub>                                                                 | B2         | ST3878             | ST131               | +         | -     | +                  | +    | -     | -     |
| 21             | <i>bla</i> <sub>CTX-M-14</sub> , <i>bla</i> <sub>CTX-M-15</sub> , <i>bla</i> <sub>TEM-1</sub>                                | A          | ST617              | ST10                | +         | -     | +                  | +    | +     | -     |
| 22             | <i>bla</i> <sub>CTX-M-14</sub> , <i>bla</i> <sub>CTX-M-15</sub> , <i>bla</i> <sub>TEM-1</sub>                                | D          | ST69               | ST69                | +         | -     | +                  | +    | +     | +     |
| 23             | <i>bla</i> <sub>CTX-M-15</sub> , <i>bla</i> <sub>TEM-1</sub>                                                                 | D          | ST405              | ST405               | +         | -     | +                  | +    | +     | +     |
| 24             | <i>bla</i> <sub>CTX-M-14</sub> , <i>bla</i> <sub>TEM-1</sub>                                                                 | A          | ST410              | ST23                | +         | -     | +                  | +    | +     | +     |
| 25             | <i>bla</i> <sub>CTX-M-15</sub> , <i>bla</i> <sub>OXA-1</sub>                                                                 | D          | ST648              | ST648               | +         | -     | +                  | +    | +     | -     |
| 26             | <i>bla</i> <sub>CTX-M-15</sub> , <i>bla</i> <sub>OXA-1</sub>                                                                 | B1         | ST94               | ST448               | +         | -     | -                  | +    | +     | -     |
| 27             | <i>bla</i> <sub>CTX-M-14</sub>                                                                                               | D          | ST405              | ST405               | -         | -     | +                  | +    | +     | -     |
| 28             | <i>bla</i> <sub>CTX-M-14</sub> , <i>bla</i> <sub>TEM-42</sub>                                                                | B2         | ST95               | ST95                | +         | -     | +                  | +    | +     | -     |
| 29             | <i>bla</i> <sub>CTX-M-15</sub> , <i>bla</i> <sub>TEM-1</sub>                                                                 | D          | ST393              | ST31                | +         | -     | +                  | +    | +     | +     |
| 30             | <i>bla</i> <sub>CTX-M-15</sub> , <i>bla</i> <sub>TEM-1</sub>                                                                 | B2         | ST838              | ST131               | -         | -     | +                  | +    | +     | -     |
| 31             | <i>bla</i> <sub>CTX-M-1</sub> , <i>bla</i> <sub>CTX-M-14</sub>                                                               | D          | ST685              | ND                  | +         | -     | +                  | +    | +     | +     |
| 32             | <i>bla</i> <sub>CTX-M-14</sub> , <i>bla</i> <sub>CTX-M-15</sub>                                                              | D          | ST4849             | ND                  | +         | -     | +                  | +    | +     | +     |
| 33             | <i>bla</i> <sub>CTX-M-15</sub> , <i>bla</i> <sub>TEM-42</sub> , <i>bla</i> <sub>OXA-1</sub>                                  | B2         | ST4354             | ST131               | +         | -     | +                  | +    | +     | -     |
| 34             | <i>bla</i> <sub>CTX-M-14</sub> , <i>bla</i> <sub>TEM-1</sub>                                                                 | B2         | ST3213             | ST131               | -         | -     | +                  | +    | -     | -     |
| 35             | <i>bla</i> <sub>CTX-M-14</sub> , <i>bla</i> <sub>CTX-M-15</sub> , <i>bla</i> <sub>TEM-1</sub> , <i>bla</i> <sub>SHV-12</sub> | A          | ST410              | ST23                | +         | -     | +                  | +    | +     | -     |
| 36             | <i>bla</i> <sub>CTX-M-14</sub> , <i>bla</i> <sub>TEM-1</sub>                                                                 | A          | ST617              | ST10                | +         | -     | +                  | +    | +     | -     |

**Table S3.** Phenotypic and genotypic characteristics of aquatic isolates included in the study (*n*=33)

| N <sup>o</sup> | Source <sup>1</sup> | β-lactamase genes                                                                          | Phylogroup | MLST               |                     | Integrans |       | Insertion Sequence |      |       |       |
|----------------|---------------------|--------------------------------------------------------------------------------------------|------------|--------------------|---------------------|-----------|-------|--------------------|------|-------|-------|
|                |                     |                                                                                            |            | Sequence type (ST) | Clonal complex (CC) | intI1     | intI2 | ISEcp1             | IS26 | IS903 | ISCR1 |
| 1              | WWTP                | <i>bla</i> <sub>CTX-M-14</sub>                                                             | B1         | ST616              | ST155               | +         | -     | +                  | +    | -     | -     |
| 2              | WWTP                | <i>bla</i> <sub>CTX-M-15</sub> , <i>bla</i> <sub>OXA-1</sub>                               | A          | ST617              | ST10                | +         | -     | +                  | +    | +     | -     |
| 3              | WWTP                | <i>bla</i> <sub>CTX-M-15</sub>                                                             | B2         | ST3264             | ND <sup>2</sup>     | +         | -     | +                  | +    | +     | -     |
| 4              | WWTP                | <i>bla</i> <sub>CTX-M-1</sub>                                                              | B1         | ST906              | ND                  | +         | -     | +                  | +    | +     | -     |
| 5              | WWTP                | <i>bla</i> <sub>CTX-M-15</sub> , <i>bla</i> <sub>TEM-1</sub> , <i>bla</i> <sub>OXA-1</sub> | B1         | ST4764             | ND                  | +         | -     | +                  | +    | +     | -     |
| 6              | WWTP                | <i>bla</i> <sub>CTX-M-14</sub> , <i>bla</i> <sub>TEM-1</sub>                               | D          | ST57               | ST350               | +         | -     | +                  | +    | -     | -     |
| 7              | WWTP                | <i>bla</i> <sub>CTX-M-15</sub>                                                             | D          | ST950              | ND                  | +         | -     | +                  | +    | -     | -     |
| 8              | WWTP                | <i>bla</i> <sub>CTX-M-14</sub>                                                             | A          | ST615              | ST46                | +         | -     | +                  | +    | +     | -     |
| 9              | WWTP                | <i>bla</i> <sub>CTX-M-1</sub>                                                              | A          | ST93               | ST168               | +         | -     | +                  | +    | +     | -     |
| 10             | WWTP                | <i>bla</i> <sub>CTX-M-1</sub>                                                              | D          | ST69               | ST69                | +         | -     | +                  | +    | -     | -     |
| 11             | WWTP                | <i>bla</i> <sub>CTX-M-14</sub> , <i>bla</i> <sub>TEM-1</sub>                               | A          | ST167              | ST10                | +         | -     | +                  | +    | -     | -     |
| 12             | WWTP                | <i>bla</i> <sub>CTX-M-1</sub>                                                              | B1         | ST162              | ST469               | +         | -     | +                  | +    | +     | -     |
| 13             | WWTP                | <i>bla</i> <sub>CTX-M-15</sub>                                                             | A          | ST615              | ST46                | -         | -     | +                  | +    | +     | -     |
| 14             | WWTP                | <i>bla</i> <sub>TEM-42</sub> , <i>bla</i> <sub>SHV-12</sub>                                | A          | ST611              | ST156               | +         | -     | +                  | +    | +     | -     |
| 15             | WWTP                | <i>bla</i> <sub>CTX-M-14</sub>                                                             | B1         | ST446              | ST446               | +         | -     | +                  | +    | +     | -     |
| 16             | WWTP                | <i>bla</i> <sub>CTX-M-14</sub> , <i>bla</i> <sub>TEM-1</sub>                               | D          | ST686              | ND                  | +         | -     | +                  | +    | +     | -     |
| 17             | R                   | <i>bla</i> <sub>CTX-M-1</sub> , <i>bla</i> <sub>TEM-1</sub>                                | D          | ST906              | ND                  | +         | -     | +                  | +    | -     | -     |
| 18             | R                   | <i>bla</i> <sub>CTX-M-14</sub>                                                             | D          | ST3843             | ND                  | +         | -     | +                  | +    | +     | -     |
| 19             | R                   | <i>bla</i> <sub>CTX-M-15</sub>                                                             | D          | ST949              | ND                  | +         | -     | +                  | +    | -     | -     |
| 20             | WWTP                | <i>bla</i> <sub>CTX-M-14</sub>                                                             | D          | ST398              | ST398               | +         | -     | +                  | +    | +     | -     |
| 21             | WWTP                | <i>bla</i> <sub>CTX-M-15</sub> , <i>bla</i> <sub>OXA-1</sub>                               | D          | ST4764             | ND                  | -         | -     | +                  | -    | -     | -     |
| 22             | WWTP                | <i>bla</i> <sub>CTX-M-1</sub>                                                              | D          | ST469              | ST469               | +         | -     | +                  | +    | +     | -     |
| 23             | WWTP                | <i>bla</i> <sub>CTX-M-55</sub>                                                             | A          | ST3065             | ND                  | +         | -     | +                  | +    | +     | -     |
| 24             | R                   | <i>bla</i> <sub>CTX-M-1</sub> , <i>bla</i> <sub>TEM-1</sub>                                | B1         | ST1285             | ND                  | +         | -     | +                  | +    | +     | -     |
| 25             | R                   | <i>bla</i> <sub>CTX-M-1</sub>                                                              | D          | ST315              | ST38                | +         | -     | +                  | +    | +     | -     |
| 26             | R                   | <i>bla</i> <sub>CTX-M-1</sub> , <i>bla</i> <sub>TEM-42</sub>                               | A          | ST98               | ST10                | +         | -     | +                  | +    | +     | -     |
| 27             | R                   | <i>bla</i> <sub>CTX-M-15</sub> , <i>bla</i> <sub>TEM-1</sub>                               | B1         | ST4212             | ND                  | +         | -     | -                  | +    | +     | -     |
| 28             | R                   | <i>bla</i> <sub>CTX-M-15</sub> , <i>bla</i> <sub>TEM-1</sub>                               | A          | ST3530             | ND                  | +         | -     | +                  | +    | -     | -     |
| 29             | R                   | <i>bla</i> <sub>SHV-12</sub>                                                               | B1         | ST1196             | ND                  | -         | +     | -                  | +    | +     | -     |
| 30             | R                   | <i>bla</i> <sub>CTX-M-15</sub> , <i>bla</i> <sub>TEM-1</sub>                               | A          | ST4972             | ND                  | +         | -     | +                  | +    | +     | +     |
| 31             | R                   | <i>bla</i> <sub>CTX-M-14</sub>                                                             | D          | ST915              | ND                  | +         | -     | +                  | +    | +     | -     |
| 32             | R                   | <i>bla</i> <sub>CTX-M-14</sub>                                                             | A          | ST615              | ST46                | +         | -     | +                  | +    | +     | -     |
| 33             | R                   | <i>bla</i> <sub>CTX-M-14</sub>                                                             | A          | ST615              | ST46                | +         | -     | +                  | +    | -     | -     |

<sup>1</sup>R: river; WWTP: waste water treatment plant <sup>2</sup>ND: Not detected

**Table S4.** Phenotypic and genotypic characteristics of isolates from food (*n*=48).

| Nº | Source <sup>1</sup> | β-lactamase genes                                             | Phylogroup    | MLST               |                     | Integrans |       | Insertion Sequence |      |       |       |
|----|---------------------|---------------------------------------------------------------|---------------|--------------------|---------------------|-----------|-------|--------------------|------|-------|-------|
|    |                     |                                                               |               | Sequence type (ST) | Clonal complex (CC) | intI1     | intI2 | ISEcp1             | IS26 | IS903 | ISCR1 |
| 1  | C                   | <i>bla</i> <sub>CTX-M-14</sub>                                | D             | ST648              | ST648               | +         | +     | +                  | +    | +     | -     |
| 2  | P                   | <i>bla</i> <sub>CTX-M-14</sub>                                | A             | ST615              | ST46                | -         | -     | -                  | +    | +     | -     |
| 3  | C                   | <i>bla</i> <sub>CTX-M-14</sub> , <i>bla</i> <sub>TEM-1</sub>  | A             | ST615              | ST46                | +         | -     | +                  | +    | +     | -     |
| 4  | C                   | <i>bla</i> <sub>CTX-M-1</sub>                                 | B1            | ST155              | ST155               | +         | -     | +                  | +    | +     | -     |
| 5  | C                   | <i>bla</i> <sub>CTX-M-1</sub>                                 | B2            | ST604              | ST101               | +         | -     | +                  | +    | +     | -     |
| 6  | P                   | <i>bla</i> <sub>CTX-M-1</sub>                                 | B1            | ST179              | ST155               | +         | -     | +                  | +    | -     | -     |
| 7  | P                   | <i>bla</i> <sub>TEM-42</sub>                                  | B1            | ST776              | ND                  | -         | -     | -                  | +    | +     | -     |
| 8  | C                   | <i>bla</i> <sub>TEM-1</sub> , <i>bla</i> <sub>SHV-12</sub>    | D             | ST880              | ND                  | +         | -     | -                  | +    | -     | -     |
| 9  | B                   | <i>bla</i> <sub>CTX-M-14</sub> , <i>bla</i> <sub>TEM-42</sub> | B2            | ST883              | ND                  | +         | -     | +                  | +    | -     | -     |
| 10 | B                   | <i>bla</i> <sub>CTX-M-14</sub>                                | B1            | ST776              | ND                  | +         | +     | +                  | +    | -     | -     |
| 11 | B                   | <i>bla</i> <sub>CTX-M-1</sub>                                 | D             | ST880              | ND                  | +         | -     | +                  | +    | +     | -     |
| 12 | B                   | <i>bla</i> <sub>CTX-M-14</sub>                                | D             | ST57               | ST350               | +         | +     | +                  | +    | -     | +     |
| 13 | C                   | <i>bla</i> <sub>CTX-M-14</sub>                                | D             | ST349              | ST349               | +         | -     | +                  | +    | -     | +     |
| 14 | B                   | <i>bla</i> <sub>CTX-M-14</sub>                                | B1            | ST448              | ST448               | +         | -     | +                  | +    | +     | -     |
| 15 | B                   | <i>bla</i> <sub>TEM-55</sub>                                  | B1            | ST179              | ST155               | +         | -     | -                  | +    | +     | -     |
| 16 | B                   | <i>bla</i> <sub>CTX-M-1</sub>                                 | A             | ST373              | ST168               | +         | -     | +                  | +    | -     | -     |
| 17 | P                   | <i>bla</i> <sub>CTX-M-14</sub> , <i>bla</i> <sub>TEM-1</sub>  | A             | ST44               | ST10                | +         | -     | -                  | +    | +     | -     |
| 18 | C                   | <i>bla</i> <sub>CTX-M-14</sub>                                | B2            | ST619              | ST101               | +         | +     | +                  | +    | -     | -     |
| 19 | P                   | <i>bla</i> <sub>CTX-M-2</sub>                                 | D             | ST955              | ND                  | +         | -     | -                  | +    | -     | +     |
| 20 | P                   | <i>bla</i> <sub>CTX-M-14</sub> , <i>bla</i> <sub>TEM-42</sub> | D             | ST648              | ST648               | +         | -     | +                  | +    | -     | +     |
| 21 | P                   | <i>bla</i> <sub>CTX-M-14</sub>                                | A             | ST453              | ST86                | -         | -     | +                  | +    | +     | -     |
| 22 | C                   | <i>bla</i> <sub>CTX-M-15</sub> , <i>bla</i> <sub>TEM-42</sub> | A             | ST43               | ST10                | +         | -     | +                  | +    | +     | +     |
| 23 | C                   | <i>bla</i> <sub>CTX-M-15</sub> , <i>bla</i> <sub>TEM-42</sub> | B1            | ST179              | ST155               | +         | -     | -                  | +    | -     | +     |
| 24 | C                   | <i>bla</i> <sub>CTX-M-14</sub>                                | A             | ST4402             | ND                  | +         | -     | +                  | +    | +     | -     |
| 25 | C                   | <i>bla</i> <sub>CTX-M-14</sub>                                | A             | ST98               | ST10                | +         | -     | +                  | +    | -     | -     |
| 26 | B                   | <i>bla</i> <sub>CTX-M-8</sub> , <i>bla</i> <sub>TEM-1</sub>   | B1            | ST949              | ND                  | +         | -     | -                  | +    | -     | -     |
| 27 | C                   | <i>bla</i> <sub>CTX-M-2</sub> , <i>bla</i> <sub>TEM-42</sub>  | D             | ST844              | ND                  | +         | -     | -                  | +    | -     | -     |
| 28 | C                   | <i>bla</i> <sub>SHV-12</sub>                                  | A             | ST6648             | ND                  | +         | -     | -                  | +    | -     | -     |
| 29 | C                   | <i>bla</i> <sub>CTX-M-1</sub>                                 | F             | ST117              | ND                  | +         | -     | +                  | +    | -     | -     |
| 30 | C                   | <i>bla</i> <sub>TEML-171</sub> , <i>bla</i> <sub>SHV-12</sub> | B1            | ST101              | ST101               | +         | -     | -                  | +    | -     | -     |
| 31 | C                   | <i>bla</i> <sub>CTX-M-1</sub>                                 | C             | ST23               | ST23                | +         | -     | +                  | +    | +     | -     |
| 32 | C                   | <i>bla</i> <sub>SHV-12</sub>                                  | F             | ST2085             | ND                  | +         | -     | -                  | +    | -     | -     |
| 33 | C                   | <i>bla</i> <sub>TEML-278</sub> , <i>bla</i> <sub>SHV-12</sub> | ND            | ST2599             | ND                  | +         | -     | -                  | +    | +     | -     |
| 34 | C                   | <i>bla</i> <sub>CTX-M-1</sub>                                 | A             | ST373              | ST168               | +         | -     | +                  | +    | +     | -     |
| 35 | C                   | <i>bla</i> <sub>TEML-171</sub> , <i>bla</i> <sub>SHV-12</sub> | ND            | ST2062             | ND                  | +         | +     | -                  | +    | +     | -     |
| 36 | C                   | <i>bla</i> <sub>SHV-12</sub>                                  | F             | ST354              | ST354               | +         | +     | -                  | +    | +     | -     |
| 37 | C                   | <i>bla</i> <sub>SHV-12</sub>                                  | Clade I or II | ST23               | ST 23               | +         | -     | -                  | +    | -     | -     |
| 38 | C                   | <i>bla</i> <sub>SHV-12</sub>                                  | A             | ND                 | ND                  | +         | -     | -                  | +    | -     | -     |
| 39 | C                   | <i>bla</i> <sub>SHV-12</sub>                                  | A             | ST665              | ND                  | +         | +     | -                  | +    | -     | -     |
| 40 | C                   | <i>bla</i> <sub>TEML-171</sub> , <i>bla</i> <sub>SHV-12</sub> | F             | ST354              | ST35                | +         | -     | -                  | +    | +     | -     |
| 41 | C                   | <i>bla</i> <sub>CTX-M-1</sub> , <i>bla</i> <sub>SHV-12</sub>  | A             | ST93               | ST168               | +         | +     | +                  | +    | +     | -     |
| 42 | C                   | <i>bla</i> <sub>TEML-171</sub> , <i>bla</i> <sub>SHV-12</sub> | B1            | ST937              | ND                  | +         | -     | -                  | +    | +     | -     |
| 43 | C                   | <i>bla</i> <sub>TEML-171</sub> , <i>bla</i> <sub>SHV-12</sub> | A             | ST10               | ST10                | +         | +     | +                  | +    | +     | -     |
| 44 | C                   | <i>bla</i> <sub>SHV-12</sub>                                  | F             | ST117              | ND                  | +         | -     | -                  | +    | +     | -     |
| 45 | C                   | ND <sup>2</sup>                                               | F             | ST117              | ND                  | -         | -     | -                  | +    | +     | +     |
| 46 | C                   | ND                                                            | B1            | ST1524             | ND                  | +         | -     | -                  | +    | +     | +     |

|    |   |                                                                                                   |    |        |    |   |   |   |   |   |   |
|----|---|---------------------------------------------------------------------------------------------------|----|--------|----|---|---|---|---|---|---|
| 47 | C | <i>bla</i> <sub>CTX-M-14</sub> , <i>bla</i> <sub>TEML-171</sub> ,<br><i>bla</i> <sub>SHV-12</sub> | A  | ST6094 | ND | + | - | - | + | + | - |
| 48 | C | ND                                                                                                | B1 | ND     | ND | + | - | + | + | + | - |

<sup>1</sup> B: beef; P: pork; C: chicken <sup>2</sup> ND: Not detected

**Table S5.** Phenotypic and genotypic characteristics of isolates from farm origin included in the study (*n*=20)

| N <sup>o</sup> | Source <sup>1</sup> | β-lactamase genes                                                                                                        | Phylogroup | MLST               |                     | Integrans |       | Insertion Sequence |      |       |       |
|----------------|---------------------|--------------------------------------------------------------------------------------------------------------------------|------------|--------------------|---------------------|-----------|-------|--------------------|------|-------|-------|
|                |                     |                                                                                                                          |            | Sequence type (ST) | Clonal complex (CC) | intI1     | intI2 | ISEcp1             | IS26 | IS903 | ISCR1 |
| 1              | S                   | <i>bla</i> <sub>TEM-1</sub> , <i>bla</i> <sub>SHV-12</sub>                                                               | B2         | ST359              | ND                  | -         | -     | -                  | +    | -     | -     |
| 2              | S                   | <i>bla</i> <sub>CTX-M-1</sub> , <i>bla</i> <sub>TEM-1</sub>                                                              | B2         | ST3333             | ND                  | +         | -     | +                  | +    | +     | -     |
| 3              | S                   | <i>bla</i> <sub>CTX-M-14</sub> , <i>bla</i> <sub>TEM-42</sub>                                                            | A          | ST10               | ST10                | +         | -     | +                  | +    | +     | -     |
| 4              | S                   | <i>bla</i> <sub>CTX-M-14</sub> , <i>bla</i> <sub>TEM-42</sub>                                                            | A          | ST10               | ST10                | +         | -     | +                  | +    | +     | -     |
| 5              | S                   | <i>bla</i> <sub>CTX-M-1</sub> , <i>bla</i> <sub>TEM-1</sub>                                                              | A          | ST88               | ST23                | +         | -     | +                  | +    | -     | -     |
| 6              | S                   | <i>bla</i> <sub>CTX-M-1</sub> , <i>bla</i> <sub>TEM-42</sub>                                                             | A          | ST88               | ST23                | +         | -     | +                  | +    | +     | -     |
| 7              | S                   | <i>bla</i> <sub>CTX-M-14</sub> , <i>bla</i> <sub>TEM-1</sub>                                                             | B2         | ST610              | ND                  | +         | -     | +                  | +    | -     | -     |
| 8              | S                   | <i>bla</i> <sub>CTX-M-1</sub> , <i>bla</i> <sub>TEM-1</sub> , <i>bla</i> <sub>SHV-12</sub> , <i>bla</i> <sub>OXA-1</sub> | B2         | ST891              | ND                  | +         | -     | +                  | +    | -     | -     |
| 9              | S                   | <i>bla</i> <sub>SHV-12</sub>                                                                                             | B2         | ST878              | ND                  | -         | -     | -                  | +    | -     | -     |
| 10             | S                   | <i>bla</i> <sub>CTX-M-14</sub>                                                                                           | B2         | ST883              | ND                  | +         | -     | +                  | +    | -     | -     |
| 11             | S                   | <i>bla</i> <sub>CTX-M-14</sub>                                                                                           | B2         | ST883              | ND                  | +         | -     | +                  | +    | -     | -     |
| 12             | S                   | <i>bla</i> <sub>CTX-M-15</sub> , <i>bla</i> <sub>TEM-42</sub>                                                            | A          | ST617              | ST10                | +         | -     | -                  | +    | +     | -     |
| 13             | S                   | <i>bla</i> <sub>CTX-M-1</sub>                                                                                            | B2         | ST619              | ST101               | +         | -     | +                  | +    | -     | -     |
| 14             | S                   | <i>bla</i> <sub>CTX-M-1</sub> , <i>bla</i> <sub>TEM-42</sub> , <i>bla</i> <sub>SHV-12</sub>                              | A          | ST373              | ST168               | +         | -     | +                  | +    | +     | -     |
| 15             | F                   | <i>bla</i> <sub>CTX-M-1</sub>                                                                                            | B1         | ST3561             | ND                  | +         | -     | +                  | +    | -     | -     |
| 16             | F                   | <i>bla</i> <sub>CTX-M-1</sub>                                                                                            | B1         | ST602              | ST446               | +         | -     | +                  | +    | -     | -     |
| 17             | F                   | <i>bla</i> <sub>CTX-M-1</sub>                                                                                            | B1         | ST446              | ST446               | +         | -     | +                  | +    | +     | -     |
| 18             | F                   | <i>bla</i> <sub>CTX-M-1</sub>                                                                                            | B1         | ST446              | ST446               | +         | -     | +                  | +    | -     | -     |
| 19             | F                   | <i>bla</i> <sub>CTX-M-14</sub>                                                                                           | A          | ST88               | ST23                | +         | -     | +                  | +    | -     | -     |
| 20             | F                   | <i>bla</i> <sub>CTX-M-14</sub> , <i>bla</i> <sub>TEML-171</sub>                                                          | C          | ND <sup>2</sup>    | ND                  | +         | -     | -                  | +    | +     | -     |

<sup>1</sup> S: farm soil; F: feed <sup>2</sup> ND: Not detected

**Table S6.** Phenotypic and genotypic characteristics of isolates from healthy people (*n*=13)

| N <sup>o</sup> | Sex <sup>1</sup> /age range | β-lactamase genes                                                                                | Phylogroup | MLST               |                     | Integrans |       | Insertion Sequence |      |       |       |
|----------------|-----------------------------|--------------------------------------------------------------------------------------------------|------------|--------------------|---------------------|-----------|-------|--------------------|------|-------|-------|
|                |                             |                                                                                                  |            | Sequence type (ST) | Clonal complex (CC) | intI1     | intI2 | ISEcp1             | IS26 | IS903 | ISCR1 |
| 1              | M <sub>40-65</sub>          | <i>bla</i> <sub>CTX-M-14</sub> , <i>bla</i> <sub>TEM-116</sub>                                   | B1         | ST971              | ND                  | +         | -     | -                  | +    | +     | -     |
| 2              | F <sub>5-18</sub>           | <i>bla</i> <sub>CTX-M-14</sub> , <i>bla</i> <sub>TEM-116</sub>                                   | A          | ST2404             | ND                  | +         | -     | -                  | +    | +     | +     |
| 3              | F <sub>18-40</sub>          | <i>bla</i> <sub>CTX-M-1</sub> , <i>bla</i> <sub>TEML-171</sub>                                   | D          | ST38               | ST38                | +         | -     | -                  | +    | +     | -     |
| 4              | F <sub>18-40</sub>          | <i>bla</i> <sub>CTX-M-1</sub> , <i>bla</i> <sub>TEML-171</sub>                                   | ND         | ND                 | ND                  | +         | +     | -                  | +    | +     | -     |
| 5              | M <sub>18-40</sub>          | <i>bla</i> <sub>CTX-M-14</sub> , <i>bla</i> <sub>CTX-M-15</sub> , <i>bla</i> <sub>TEML-171</sub> | B2         | ST131              | ST13                | +         | -     | +                  | +    | -     | -     |
| 6              | F <sub>18-40</sub>          | <i>bla</i> <sub>CTX-M-14</sub>                                                                   | A          | ND                 | ND                  | +         | -     | +                  | +    | -     | -     |
| 7              | F <sub>18-40</sub>          | <i>bla</i> <sub>TEML-171</sub>                                                                   | A          | ND                 | ND                  | +         | -     | +                  | +    | -     | -     |
| 8              | M <sub>40-65</sub>          | <i>bla</i> <sub>CTX-M-15</sub> , <i>bla</i> <sub>TEML-171</sub>                                  | B2         | ST131              | ST131               | +         | -     | +                  | +    | -     | -     |
| 9              | M <sub>40-65</sub>          | <i>bla</i> <sub>CTX-M-15</sub> , <i>bla</i> <sub>TEML-171</sub>                                  | B2         | ST131              | ST131               | +         | -     | +                  | +    | +     | -     |
| 10             | M <sub>&gt;65</sub>         | <i>bla</i> <sub>CTX-M-14</sub>                                                                   | B2         | ST131              | ST131               | +         | -     | -                  | +    | +     | -     |
| 11             | M <sub>5-18</sub>           | <i>bla</i> <sub>CTX-M-14</sub>                                                                   | B2         | ST3483             | ST131               | +         | -     | -                  | +    | +     | -     |
| 12             | F <sub>5-18</sub>           | <i>bla</i> <sub>CTX-M-15</sub>                                                                   | C          | ND                 | ND                  | +         | -     | -                  | +    | -     | -     |
| 13             | F <sub>&gt;65</sub>         | ND <sup>2</sup>                                                                                  | D          | ND                 | ND                  | +         | -     | -                  | +    | -     | -     |

<sup>1</sup> F: Female; M: Male <sup>2</sup> ND: Not detected
